# Supplementary material for: How Working Memory Provides Representational Change During Insight Problem Solving
Source: Front Psychol. 2018 Oct 1;9:1864. doi: 10.3389/fpsyg.2018.01864 (PMC6174229; doi:10.3389/fpsyg.2018.01864)
Supplement: TABLE S4 — The solution time and solution rate data for both experiments. [file Table_4.XLSX]

## Sheet: Problems
Problems from Experiment 1					Problems from Experiment 2
Insight problems					Insight problems
1	Coin	A dealer of antique coins received an offer to buy a beautiful bronze coin by an unknown man. The coin had an emperor’s head on one side and the date 44 B.C. stamped on the other side. The dealer examined the coin, but instead of buying it, he called the police to arrest the man. What made him realise that the coin was fake?	BBC is a term used after Christ, not before		1	Sally Lu	Sally Lu likes eucalyptus more than pine. She likes electric lighting and does not like to sit by candlelight. Eccentric people evoke more sympathy from her than balanced ones. What do you think is Sally’s profession - an economist or an accountant?		Economist
2	Socks	If you have black socks and brown socks in your drawer, mixed in a ratio of 4 to 5, how many socks will you have to take out to make sure that you have a pair the same color?	3		2	Hospital	Cyril spent three days in the hospital. He was not sick and was not injured, but was carried out after the discharge from the hospital. Why?		He was a baby
3	Ladder	Mr. Hardy was washing windows on a high-rise office building when he slipped and fell off a 60-foot ladder onto the concrete sidewalk below. Incredibly, he did not injure himself in any way. How is this possible?	He was not high off the ground		3	Chain problem	You have 4 pieces of a chain necklace that you want to make into a single circle, as shown. It costs $2 to open a link and $3 to close a link. You have a total of $15. How can the four strands be connected into a single chain?		Open all the links from one piece and use those to attach the three remaining pieces together
4	Fishing	Two mothers and two daughters were fishing. They managed to catch one big fish, one small fish, and one fat fish. Since only three fish were caught how is it possible that each woman had her own fish?	It was daughter, mother and grandmother		4	Six pencils	Organize 6 identical pencils to get 4 equiangular triangles.		Make a pyramid, three on the base and three on the sides
Non-insight problems					Non-insight problems
5	Calendar	Next week, I am going to have lunch with my friend, visit the new art gallery, go to the Social Security office, and have my teeth checked at the dentist. My friend cannot meet me on Wednesday, the Social Security office is closed weekends; the dentist has office hours only on Tuesday, Friday, and Saturday; the art gallery is closed Tuesday, Thursday, and weekends. On which day can I do everythin…	Friday		5	Seven matchsticks	The number 1/7 is made from seven matchsticks. Turn this fraction into the number 1/3, not adding and not taking away any matchsticks.		II/VI
6	Writing	The first typist prints 8 pages per hour when the second one prints for 4 hours as much pages as the first one for 3 hours. How many pages will both typists print for 11 hours of collaboration?	154		6	Inequality	Turn inequality into equality by moving one match.		9 + 3 - 4 = 8
7	Weighting	Given four coins of identical look and feel, two of which are slightly heavier and two are slightly lighter, how could one identify all of them when only allowed to use the balance scale twice?	Begin by placing one coin on each side of the scale. If they do not balance, then you have already identified one heavy and one light coin. Repeating the procedure with the remaining two coins will identify the other light and heavy coins. If the initial two coins balance, simply remove one of the coins and replace it with one of the remaining coins. This weighing will provide the remaining infor…		7	Relatives	Marina is a sister of the aunt’s husband of Tatiana’s daughter. Who is Marina for Tatiana as a relative?		She is an aunt
8	Tourism	On an island unusually regular climate: on Mondays and Wednesdays there are always raining, on Saturdays - fog, but on other days - it's sunny. On morning of which day of the week should a group of tourists start their vacation if they want to stay there for 44 days and seize as many sunny days as possible?	Thursday		8	Dance	Three couples went to a party together. One woman was dressed in red, another one - in green and the third one - in blue. The men were also dressed in one of these colors. When all three couples danced, a man in red danced with the woman in blue. “Christina, it is funny, isn’t it? None of us danced with a partner dressed in the same color”. Think about the man dancing with the woman in red. What …		Green. Since the man in blue is dancing with the woman in red the man in green has the choice of either the woman in red or green (he cannot dance with green so he is dancing with the woman in red).

## Sheet: Experiment 1. Control
	Coin	Socks	Ladder	Fishing	Calendar	Writing	Weighting	Tourism
1	132	42	90	39	43	260	194	120			Amount of problems		256 total /128 in condition
2	284	51	252	186	99	more than 300 s	133	240
3	more than 300 s	95	51	68	93	92	175	44			More than 300 s
4	248	155	less than 30 s	less than 30 s	63	81	84	53			1) insight problems		20
5	185	more than 300 s	33	35	148	115	109	75			2) non-insight problems		6
6	145	84	less than 30 s	more than 300 s	58	157	275	170
7	155	50	know	159	118	220	257	81			Participant knows the answer
8	less than 30 s	117	36	35	65	107	45	115			1) insight problems		3
9	less than 30 s	118	less than 30 s	84	97	134	115	more than 300 s
10	109	less than 30 s	less than 30 s	less than 30 s	50	85	58	less than 30 s			Less than 30 s
11	233	77	37	87	111	122	more than 300 s	88			1) insight problems		28
12	more than 300 s	182	more than 300 s	115	32	50	155	47			2) non-insight problems		3
13	92	less than 30 s	189	know	38	100	80	30
14	more than 300 s	134	less than 30 s	30	128	112	more than 300 s	67			Average solution time
15	68	less than 30 s	less than 30 s	less than 30 s	less than 30 s	120	82	57			1) insight problems		106.117
16	more than 300 s	202	more than 300 s	less than 30 s	44	102	more than 300 s	125			2) non-insight problems		102.807
17	137	33	65	less than 30 s	55	less than 30 s	48	49
18	106	138	55	less than 30 s	62	53	78	183
19	more than 300 s	more than 300 s	183	270	70	103	120	120
20	30	82	58	71	57	61	293	52				Amount problems	Know	More than 300 s	Less than 30 s	Average
21	less than 30 s	55	191	less than 30 s	41	37	150	52			Coin	32	0	12	3	144.353
22	51	83	less than 30 s	less than 30 s	35	73	161	72			Socks	32	0	3	3	94.5385
23	more than 300 s	57	more than 300 s	116	58	186	89	48			Ladder	32	2	3	11	100.125
24	more than 300 s	92	169	104	60	106	85	92			Fishing	32	1	2	11	92.0556
25	51	35	less than 30 s	less than 30 s	50	153	129	45			Calendar	32	0	0	1	65.5161
26	more than 300 s	154	less than 30 s	65	44	69	more than 300 s	46			Writing	32	0	1	1	113.633
27	more than 300 s	31	73	less than 30 s	66	93	204	162			Weighting	32	0	4	0	139.5
28	more than 300 s	127	know	90	40	195	227	254			Tourism	32	0	1	1	96.2667
29	187	180	54	more than 300 s	54	137	224	60
30	more than 300 s	35	less than 30 s	less than 30 s	52	41	32	145
31	more than 300 s	more than 300 s	less than 30 s	33	42	99	89	64
32	241	49	66	70	58	146	215	132

## Sheet: Experiment 1. Experimental
	Coin	Socks	Ladder	Fishing	Calendar	Writing	Weighting	Tourism
1	more than 300 s	142.058	less than 30 s	less than 30 s	43.4756	63.3207	170.771	63.1582			Amount of problems		256 /128 in condition
2	more than 300 s	210.092	54.3462	less than 30 s	73.6985	75.3181	45.1296	63.6919
3	more than 300 s	110.255	more than 300 s	85.2028	133.794	162.057	123.668	241.975			More than 300 s
4	less than 30 s	133.167	111.38	57.1606	107.025	59.9065	75.8761	121.14			1) insight problems		15
5	more than 300 s	more than 300 s	33.9183	53.1025	155.221	254.532	61.8469	58.4812			2) non-insight problems		3
6	97.3845	119.458	35.1347	86.0606	98.1346	66.1567	55.2185	69.5694
7	more than 300 s	148.91	36.1167	54.6588	92.3574	139.2	198.929	220.572			Participant knows the answer
8	93.2834	185.034	89.9804	less than 30 s	39.2191	70.7076	92.8814	137.492			1) insight problems		1
9	less than 30 s	65.6515	37.7142	101.648	62.9912	less than 30 s	45.102	141.962
10	205.045	208.704	less than 30 s	42.0471	71.3108	68.4684	86.4406	161.049			Unsolved
11	226.126	210.925	less than 30 s	55.0156	98.9809	218.431	125.497	184.602			1) insight problems		9
12	50.8028	217.484	unsolved	92.8376	77.8749	225.491	more than 300 s	245.72			2) non-insight problems		1
13	less than 30 s	109.689	unsolved	36.8063	71.6314	113.406	44.7276	47.5351
14	34.604	72.763	less than 30 s	50.6386	less than 30 s	56.6496	77.9215	less than 30 s			Less than 30 s
15	more than 300 s	121.217	34.663	57.8975	97.9675	171.558	218.548	67.8608			1) insight problems		21
16	more than 300 s	97.0227	34.1484	36.5061	100.78	132.404	170.306	64.1556			2) non-insight problems		3
17	unsolved	63.907	102.991	unsolved	67.4815	130.304	unsolved	85.6038
18	147.09	105.811	more than 300 s	less than 30 s	60.9812	more than 300 s	79.0846	47.8714			Average solution time
19	know	31.995	37.374	32.5129	42.8177	111.461	173.377	52.5902			1) insight problems		105.94
20	more than 300 s	44.7117	157.915	less than 30 s	67.8246	90.5658	49.4146	96.9967			2) non-insight problems		111.327
21	218.355	190.762	87.7922	less than 30 s	88.1888	121.179	141.068	211.168
22	58.9255	59.0403	232.289	84.8337	52.0415	88.0791	110.84	85.0078
23	80.5624	84.6521	less than 30 s	33.4996	128.838	84.4268	251.948	119.086				Amount problems	Know	More than 300 s	Unsolved	Less than 30 s	Average
24	unsolved	110.669	more than 300 s	178.833	91.6944	104.224	more than 300 s	158.529			Coin	32	1	10	6	3	118.101
25	more than 300 s	270.403	40.5809	less than 30 s	58.266	151.852	101.453	179.162			Socks	32	0	1	0	1	128.531
26	unsolved	less than 30 s	less than 30 s	228.986	95.0052	222.028	205.557	168.095			Ladder	32	0	4	2	7	84.0917
27	unsolved	199.413	172.722	156.297	83.8305	117.27	100.846	131.221			Fishing	32	0	0	1	10	86.4858
28	unsolved	121.217	88.7114	175.787	81.9862	132.026	93.8032	67.0534			Calendar	32	0	0	0	1	82.8788
29	more than 300 s	37.3819	less than 30 s	less than 30 s	84.0703	86.692	58.3273	128.109			Writing	32	0	1	0	1	124.358
30	133.341	157.963	177.397	less than 30 s	130.883	90.7459	139.111	99.3202			Weighting	32	0	2	1	0	121.318
31	71.6914	146.977	32.5678	less than 30 s	63.4085	174.599	287.963	57.8452			Tourism	32	0	0	0	1	117.817
32	unsolved	78.5884	more than 300 s	115.868	47.4628	147.69	132.565	75.7123

## Sheet: Experiment1. Statistics&Results
T-test
	Control		Experimental			Paired Samples Statistics
	Insight	Non-insight	Insight	Non-insight				Mean	N	Std. Deviation	Std. Error Mean		CI	control group, insight problems
1	75.75	154.25	142.058	85.1814		Pair 1	CI	105.466	32	48.8827	8.64132		CN	control group, non-insight problems
2	193.25	157.333	132.219	64.4595			CN	102.036	32	34.822	6.15573		EI	experimental group, insight problems
3	71.3333	101	97.7289	165.374		Pair 2	EI	107.98	32	46.0083	8.13319		EN	experimental group, non-insight problems
4	201.5	70.25	100.569	90.987			EN	110.522	32	34.6553	6.12626
5	84.3333	111.75	43.5104	132.52
6	114.5	165	84.5094	72.2698
7	121.333	169	79.8952	162.765		Tests of Within-Subjects Effects
8	62.6667	83	122.766	85.075		Source		Type III Sum of Squares	df	Mean Square	F	Sig.	Partial Eta Squared	Noncent. Parameter	Observed Powera
9	101	115.333	68.338	83.3518		problem	Sphericity Assumed	6.30409	1	6.30409	0.00361051	0.952279	5.82307e-05	0.00361051	0.050401
10	109	64.3333	151.932	96.8172			Greenhouse-Geisser	6.30409	1	6.30409	0.00361051	0.952279	5.82307e-05	0.00361051	0.050401
11	108.5	107	164.022	156.878			Huynh-Feldt	6.30409	1	6.30409	0.00361051	0.952279	5.82307e-05	0.00361051	0.050401
12	148.5	71	120.375	183.029			Lower-bound	6.30409	1	6.30409	0.00361051	0.952279	5.82307e-05	0.00361051	0.050401
13	140.5	62	73.2478	69.325		problem * Group	Sphericity Assumed	285.287	1	285.287	0.163391	0.687444	0.00262841	0.163391	0.0683352
14	82	102.333	52.6685	67.2856			Greenhouse-Geisser	285.287	1	285.287	0.163391	0.687444	0.00262841	0.163391	0.0683352
15	68	86.3333	71.2592	138.984			Huynh-Feldt	285.287	1	285.287	0.163391	0.687444	0.00262841	0.163391	0.0683352
16	202	90.3333	55.8924	116.912			Lower-bound	285.287	1	285.287	0.163391	0.687444	0.00262841	0.163391	0.0683352
17	78.3333	50.6667	83.4491	94.4632		Error(problem)	Sphericity Assumed	108254	62	1746.04
18	99.6667	94	126.451	62.6457			Greenhouse-Geisser	108254	62	1746.04
19	226.5	103.25	33.9606	95.0616			Huynh-Feldt	108254	62	1746.04
20	60.25	115.75	101.314	76.2004			Lower-bound	108254	62	1746.04
21	123	70	165.636	140.401		a. Computed using alpha = ,05
22	67	85.25	108.772	83.9921
23	86.5	95.25	66.238	146.075		Tests of Between-Subjects Effects
24	121.667	85.75	144.751	118.149		Source	Type III Sum of Squares	df	Mean Square	F	Sig.	Partial Eta Squared	Noncent. Parameter	Observed Powera
25	43	94.25	155.492	122.683		Intercept	1.45183e+06	1	1.45183e+06	847.102	7.34501e-38	0.931801	847.102	1
26	109.5	53	228.986	172.671		Group	967.741	1	967.741	0.564648	0.455236	0.00902503	0.564648	0.114679
27	52	131.25	176.144	108.292		Error	106261	62	1713.88
28	108.5	179	128.572	93.7171		a. Computed using alpha = ,05
29	140.333	118.75	37.3819	89.2997
30	35	67.5	156.234	115.015
31	33	73.5	83.7455	145.954
32	106.5	137.75	97.2283	100.857		Paired Samples Test
								Paired Differences					t	df	Sig. (2-tailed)
								Mean	Std. Deviation	Std. Error Mean	95% Confidence Interval of the Difference
											Lower	Upper
						Pair 1	CI - CN	3.42969	57.7944	10.2167	-17.4074	24.2668	0.335694	31	0.739363
						Pair 2	EI - EN	-2.54199	50.6917	8.96112	-20.8183	15.7343	-0.283669	31	0.77855
						Independent Samples Test for control and experimental groups
								Levene's Test for Equality of Variances		t-test for Equality of Means
								F	Sig.	t	df	Sig. (2-tailed)	Mean Difference	Std. Error Difference	95% Confidence Interval of the Difference
															Lower	Upper
						Non-insight	Equal variances assumed	0.159967	0.690561	-0.977017	62	0.332357	-8.4851	8.6847	-25.8456	8.87536
						Insight	Equal variances assumed	0.0222737	0.881846	-0.211803	62	0.832955	-2.51343	11.8668	-26.2348	21.208
						Overall
								Control group			Experimental group
								Simplicity	Complexity	Total	Simplicity	Complexity	Total
						Insight problems	Coin	3 (9.375%)	12 (37.5%)	15 (46.875%)	4 (12.5%)	16 (50%)	20 (62.5%)
							Socks	3 (9.375%)	3 (9.375%)	6 (18.75%)	1 (3.125%)	1 (3.125%)	2 (6.25%)		Simplicity	less than 30 s or participant knows the answer
							Ladder	13 (40.625%)	3 (9.375%)	16 (50%)	7 (21.875%)	6 (18.75%)	13 (40.625%)		Complexity	more than 300 s or unsolved
							Fishing	12 (37.5%)	2 (6.25%)	14 (43.75%)	10 (31.25%)	1 (3.125%)	11 (34.375%)
						Non-insight problems	Calendar	1 (3.125%)	0	1 (3.125%)	1 (3.125%)	0	1 (3.125%)
							Writing	1 (3.125%)	1 (3.125%)	2 (6.25%)	1 (3.125%)	1 (3.125%)	2 (6.25%)
							Weighting	0	4 (12.5%)	4 (12.5%)	0	3 (9.375%)	3 (9.375%)
							Tourism	1 (3.125%)	1 (3.125%)	2 (6.25%)	1 (3.125%)	0	1 (3.125%)
							Control group				Experimental group
							Simplicity	Complexity	Total	Solution time (SD)	Simplicity	Complexity	Total	Solution time (SD)
						Insight problems	31 (24.22%)	20 (15.625%)	51 (39.84%)	105.47 (48.88)	22 (17.19%)	24 (18.75%)	46 (35.94%)	107.98 (46.01)
						Non-insight problems	3 (2.34%)	6 (4.69%)	9 (7.03%)	102.04 (34.82)	3 (2.34%)	4 (3.125%)	7 (5.47%)	110.52 (34.66)

## Sheet: Experiment 1. Probe rates
	Practice trials		Insight problems				Non-insight problems
	Simple	Complex	Coin	Socks	Ladder	Fishing	Calendar	Writing	Weighting	Tourism
1	1	1	more than 300 s	0.951807	less than 30 s	less than 30 s	1	1	0.971154	0.978261		Average
2	1	0.966667	more than 300 s	0.852349	0.953488	less than 30 s	0.95122	0.962963	0.947368	0.85		Practice trials		0.969841
3	1	0.866667	more than 300 s	1	more than 300 s	1	0.92	0.921053	1	0.963636		Insight problems		0.95319
4	1	0.966667	less than 30 s	0.962025	0.969072	1	0.980769	1	0.923077	0.983333		Non-insight problems		0.946756
5	1	1	more than 300 s	more than 300 s	1	1	1	0.991071	0.970588	0.970588
6	1	0.966667	0.980392	0.905405	0.925926	0.92	0.953488	0.973684	0.931034	0.957447
7	1	1	more than 300 s	0.96	1	0.894737	1	1	0.988764	1
8	0.833333	1	0.948718	0.946237	0.857143	less than 30 s	0.857143	0.833333	1	0.808511
9	0.966667	0.966667	less than 30 s	0.969697	0.938776	0.9625	0.942857	less than 30 s	1	0.934211
10	0.966667	1	0.97561	0.936842	less than 30 s	1	0.941176	0.916667	1	0.972973
11	1	0.833333	1	0.960784	less than 30 s	1	0.96875	0.965116	1	0.969697
12	1	0.866667	1	0.972222	unsolved	1	1	0.953704	more than 300 s	0.877551
13	1	0.9	less than 30 s	0.849057	unsolved	1	0.93617	0.865385	0.821429	1
14	1	1	0.962963	0.714286	less than 30 s	1	less than 30 s	0.7	0.944444	less than 30 s
15	1	1	more than 300 s	0.935484	1	0.8	0.944444	0.825	0.977273	0.909091
16	0.966667	1	more than 300 s	0.952381	0.942857	1	0.982143	0.970588	0.984375	0.926829
17	0.966667	0.9	unsolved	0.975	0.923077	unsolved	0.897959	0.929825	unsolved	0.945205
18	0.9	0.966667	0.873626	0.883117	more than 300 s	less than 30 s	0.851064	more than 300 s	0.913043	0.904762
19	1	1	know	0.928571	0.95	0.941176	1	0.966102	0.894118	0.913043
20	1	0.866667	more than 300 s	0.875	0.954955	less than 30 s	0.869565	0.9375	0.866667	0.916667
21	1	1	0.984962	0.992481	0.975904	less than 30 s	1	0.987654	0.962264	0.972603
22	0.933333		0.932203	0.970588	0.986486	0.944444	0.954545	0.9625	0.955556	0.968254
23	1	1	0.972973	0.985507	less than 30 s	0.941176	0.986667	0.972222	0.966184	0.957895
24	0.966667	1	unsolved	0.931507	more than 300 s	0.979452	1	0.934426	more than 300 s	0.938776
25	1	1	more than 300 s	0.965753	1	less than 30 s	0.958333	1	0.978723	0.985714
26	0.966667	1	unsolved	less than 30 s	less than 30 s	0.988372	0.941176	0.980392	0.985507	0.967213
27	1	0.933333	unsolved	0.945205	0.953704	0.914729	0.839286	0.941176	0.964286	0.919355
28	1	0.8	unsolved	0.966102	0.97619	1	0.978723	1	0.970588	1
29	1	1	more than 300 s	0.933333	less than 30 s	less than 30 s	0.9375	0.96875	0.964286	0.882353
30	0.933333	0.966667	0.956044	0.859813	0.977778	less than 30 s	0.926471	0.93617	0.962963	0.962963
31	0.933333	1	1	0.967742	1	less than 30 s	0.948718	0.9	0.927152	0.954545
32	1	1	unsolved	1	more than 300 s	0.953846	0.952381	0.939024	0.940299	0.9

## Sheet: Experiment 2. Control
	Seven matchsticks	Inequality	Relatives	Dance	Sally Lu	Hospital	Chain problem	Six pencils
1	256	unsolved	unsolved	120	127	less than 30 s	unsolved	unsolved
2	less than 30 s	unsolved	240	145	247	176	unsolved	179		Amount of problems		256 /128 in condition
3	79	unsolved	134	57	80	less than 30 s	unsolved	unsolved
4	144	unsolved	188	86	166	less than 30 s	unsolved	162		Participant knows the answer
5	95	72	85	159	164	43	unsolved	282		1) insight problems		7
6	70	57	135	210	179	49	153	268
7	78	70	unsolved	58	123	33	67	254		Unsolved or more than 300 s
8	less than 30 s	132	unsolved	unsolved	82	less than 30 s	unsolved	less than 30 s		1) insight problems		34
9	less than 30 s	69	102	85	unsolved	unsolved	228	178		2) non-insight problems		16
10	less than 30 s	78	46	87	42	92	unsolved	104
11	257	53	94	unsolved	190	unsolved	unsolved	300		Less than 30 s
12	222	235	102	57	47	69	unsolved	unsolved		1) insight problems		10
13	54	47	132	57	172	62	32	unsolved		2) non-insight problems		9
14	unsolved	51	60	131	104	unsolved	113	105
15	unsolved	unsolved	111	38	175	35	unsolved	unsolved		Average solution time
16	173	unsolved	276	111	180	unsolved	unsolved	unsolved		1) insight problems		112.291
17	92	281	54	83	120	66	69	unsolved		2) non-insight problems		139.532
18	30	113	unsolved	137	74	42	unsolved	unsolved
19	57	152	247	71	84	194	unsolved	70
20	119	139	151	130	158	60	unsolved	200			Amount problems	Know	Unsolved / More than 300 s	Less than 30 s	Average
21	39	60	30	54	130	26	173	unsolved		Seven matchsticks	32	0	3	8	108.333
22	42	169	53	170	less than 30 s	less than 30 s	135	197		Inequality	32	0	6	1	115.92
23	less than 30 s	62	78	65	234	know	unsolved	unsolved		Relatives	32	0	4	0	124.714
24	69	182	180	90	unsolved	know	158	251		Dance	32	0	3	0	100.034
25	less than 30 s	219	32	70	181	109	174	143		Sally Lu	32	2	2	1	142.148
26	37	141	55	unsolved	254	less than 30 s	252	216		Hospital	32	5	4	7	74.625
27	36	63	160	41	know	know	159	251		Chain problem	32	0	18	0	146.571
28	less than 30 s	61	104	110	56	less than 30 s	unsolved	213		Six pencils	32	0	10	2	183
29	122	76	70	126	163	know	66	less than 30 s
30	204	less than 30 s	91	68	know	know	273	100
31	less than 30 s	118	252	86	114	68	unsolved	58
32	unsolved	198	230	199	192	70	unsolved	129

## Sheet: Experiment 2. Experimental
	Seven matchsticks	Inequality	Relatives	Dance	Sally Lu	Hospital	Chain problem	Six pencils
1	263.82	more than 300 s	232.06	53.03	144.33	179.26	more than 300 s	158.13
2	272.77	98.4	181.65	136.08	237.84	119.06	more than 300 s	more than 300 s		Amount of problems		256 /128 in condition
3	122.93	131.08	110.6	74.33	238.06	unsolved	90.52	95.02
4	207.43	208.6	more than 300 s	82.88	165.26	114.56	255.9	180.65		Participant knows the answer
5	50.32	238.51	more than 300 s	138.13	more than 300 s	62.39	more than 300 s	198.72		1) insight problems		0
6	more than 300 s	140.36	274.42	119.29	unsolved	196.82	more than 300 s	more than 300 s
7	200.83	239.06	more than 300 s	84.48	264.62	167.42	more than 300 s	more than 300 s		More than 300 s
8	131.73	more than 300 s	285.2	182.47	200.44	less than 30 s	more than 300 s	164.55		1) insight problems		27
9	133.01	240.93	274.63	89.91	281.76	unsolved	230.93	177.36		2) non-insight problems		18
10	38.34	more than 300 s	185.21	83.94	118.2	unsolved	less than 30 s	291.87
11	135.96	more than 300 s	more than 300 s	more than 300 s	300	62.79	more than 300 s	more than 300 s		Unsolved
12	140.35	92.34	118.72	207.96	104.23	225.27	more than 300 s	283.4		1) insight problems		5
13	140.98	85.85	55.31	141.38	159.56	133.27	201.76	294.7		2) non-insight problems		0
14	more than 300 s	75.67	more than 300 s	170.25	98.26	69.7	more than 300 s	119.67
15	114.98	286.72	122.26	265.76	234.55	30	188.73	281.52		Less than 30 s
16	248.5	more than 300 s	more than 300 s	201.46	103.1	218.14	300	287.5		1) insight problems		4
17	124.46	219	38.36	220.4	more than 300 s	less than 30 s	more than 300 s	173.41		2) non-insight problems		0
18	182.74	120.7	190.26	189.22	84.82	less than 30 s	294.24	220.47
19	30	65.8	240.33	125.91	65.16	more than 300 s	177.56	131.18		Average solution time
20	220.6	275.96	more than 300 s	248.17	237.75	190.2	272	more than 300 s		1) insight problems		172.339
21	30	201.5	85.9	199.1	159.5	61.6	228.3	185.2		2) non-insight problems		156.822
22	126.95	208.6	more than 300 s	165	268	114.7	256	187.4
23	107.14	47.3	134.85	249.26	98	81.73	more than 300 s	164.45
24	221.74	125.64	58.2	124.86	178.9	297.06	more than 300 s	more than 300 s			Amount problems	Know	More than 300 s	Unsolved	Less than 30 s	Average
25	117.67	149.7	91.35	106.3	130.64	98.9	69.84	142.72		Seven matchsticks	32	0	2	0	0	146.588
26	216.93	287.84	176.45	104.3	284.6	50.32	more than 300 s	76.4		Inequality	32	0	6	0	0	176.043
27	213.07	177.75	147.14	209.44	127.95	92.19	244.77	174.27		Relatives	32	0	9	0	0	156.168
28	188.72	more than 300 s	145.32	208.05	183.1	87.49	more than 300 s	more than 300 s		Dance	32	0	1	0	0	151.091
29	69.22	294.26	72.14	187.88	190.78	31.27	more than 300 s	206.66		Sally Lu	32	0	2	1	0	171.857
30	97.78	140.3	176.1	68.36	139.03	162.69	298.43	139.36		Hospital	32	0	1	3	3	125.897
31	142.95	232	195.41	159.08	129.41	167.18	unsolved	280.3		Chain problem	32	0	16	1	1	222.07
32	105.71	193.24	more than 300 s	87.13	56.01	133.41	more than 300 s	more than 300 s		Six pencils	32	0	8	0	0	192.288

## Sheet: Experiment2. Statistics&Results
T-test
	Control		Experimental			Paired Samples Statistics
	Non-insight	Insight	Non-insight	Insight				Mean	N	Std. Deviation	Std. Error Mean		CI	control group, insight problems
1	188	127	182.97	160.573		Pair 1	CN	114.435	32	41.0905	7.26384		CN	control group, non-insight problems
2	192.5	200.667	172.225	178.45			CI	141.258	32	54.0818	9.5604		EI	experimental group, insight problems
3	90	80	109.735	141.2		Pair 2	EN	158.011	32	35.9998	6.36393		EN	experimental group, non-insight problems
4	139.333	164	166.303	179.093			EI	172.395	32	40.3334	7.13
5	102.75	163	142.32	130.555
6	118	162.25	178.023	196.82
7	68.6667	119.25	174.79	216.02		Tests of Within-Subjects Effects
8	132	82	199.8	182.495		Source		Type III Sum of Squares	df	Mean Square	F	Sig.	Partial Eta Squared	Noncent. Parameter	Observed Powera
9	85.3333	203	184.62	230.017		problem	Sphericity Assumed	13584.1	1	13584.1	8.8917	0.00409052	0.125427	8.8917	0.83533
10	70.3333	79.3333	102.497	205.035			Greenhouse-Geisser	13584.1	1	13584.1	8.8917	0.00409052	0.125427	8.8917	0.83533
11	134.667	245	135.96	181.395			Huynh-Feldt	13584.1	1	13584.1	8.8917	0.00409052	0.125427	8.8917	0.83533
12	154	58	139.843	204.3			Lower-bound	13584.1	1	13584.1	8.8917	0.00409052	0.125427	8.8917	0.83533
13	72.5	88.6667	105.88	197.322		problem * Group	Sphericity Assumed	1237.81	1	1237.81	0.810227	0.371536	0.0128996	0.810227	0.143685
14	80.6667	107.333	122.96	95.8767			Greenhouse-Geisser	1237.81	1	1237.81	0.810227	0.371536	0.0128996	0.810227	0.143685
15	74.5	105	197.43	183.7			Huynh-Feldt	1237.81	1	1237.81	0.810227	0.371536	0.0128996	0.810227	0.143685
16	186.667	180	224.98	227.185			Lower-bound	1237.81	1	1237.81	0.810227	0.371536	0.0128996	0.810227	0.143685
17	127.5	85	150.555	173.41		Error(problem)	Sphericity Assumed	94719.1	62	1527.73
18	93.3333	58	170.73	199.843			Greenhouse-Geisser	94719.1	62	1527.73
19	131.75	116	115.51	124.633			Huynh-Feldt	94719.1	62	1527.73
20	134.75	139.333	248.243	233.317			Lower-bound	94719.1	62	1527.73
21	45.75	109.667	129.125	158.65		a. Computed using alpha = ,05
22	108.5	166	166.85	206.525
23	68.3333	234	134.637	114.727		Tests of Between-Subjects Effects
24	130.25	204.5	132.61	237.98		Source	Type III Sum of Squares	df	Mean Square	F	Sig.	Partial Eta Squared	Noncent. Parameter	Observed Powera
25	107	151.75	116.255	110.525		Intercept	2.74809e+06	1	2.74809e+06	1226.67	1.45934e-42	0.951888	1226.67	1
26	77.6667	240.667	196.38	137.107		Group	44655.9	1	44655.9	19.9331	3.45764e-05	0.243285	19.9331	0.992545
27	75	205	186.85	159.795		Error	138898	62	2240.29
28	91.6667	134.5	180.697	135.295		a. Computed using alpha = ,05
29	98.5	114.5	155.875	142.903
30	121	186.5	120.635	184.878
31	152	80	182.36	192.297		Paired Samples Test
32	209	130.333	128.693	94.71				Paired Differences					t	df	Sig. (2-tailed)
								Mean	Std. Deviation	Std. Error Mean	95% Confidence Interval of the Difference
											Lower	Upper
						Pair 1	CN - CI	-26.8229	66.3037	11.721	-50.728	-2.91787	-2.28846	31	0.0290856
						Pair 2	EN - EI	-14.384	41.4092	7.32019	-29.3137	0.545582	-1.96498	31	0.0584325
						Independent Samples Test for control and experimental groups
								Levene's Test for Equality of Variances		t-test for Equality of Means
								F	Sig.	t	df	Sig. (2-tailed)	Mean Difference	Std. Error Difference	95% Confidence Interval of the Difference
															Lower	Upper
						Non-insight	Equal variances assumed	0.351678	0.555322	-4.51222	62	2.92198e-05	-43.5758	9.65728	-62.8804	-24.2712
						Insight	Equal variances assumed	3.74514	0.0575255	-2.61076	62	0.0113141	-31.1369	11.9264	-54.9774	-7.29644
						Overall
								Control group			Experimental group
								Simplicity	Complexity	Total	Simplicity	Complexity	Total		Simplicity	less than 30 s or participant knows the answer
						Non-insight problems	Seven matchsticks	8 (25%)	3 (9.375%)	11 (34.375%)	0	2 (6.25%)	2 (6.25%)		Complexity	more than 300 s or unsolved
							Inequality	1 (3.125%)	6 (18.75%)	7 (21.875%)	0	6 (18.75%)	6 (18.75%)
							Relatives	0	4 (12.5%)	4 (12.5%)	0	9 (28.125%)	9 (28.125%)
							Dance	0	3 (9.375%)	3 (9.375%)	0	1 (3.125%)	1 (3.125%)
						Insight problems	Sally Lu	3 (9.375%)	2 (6.25%)	5 (15.625%)	0	3 (9.375%)	3 (9.375%)
							Hospital	12 (37.5%)	4 (12.5%)	16 (50%)	3 (9.375%)	4 (12.5%)	7 (21.875%)
							Chain problem	0	18 (56.25%)	18 (56.25%)	1 (3.125%)	17 (53.125%)	18 (56.25%)
							Six pencils	2 (6.25%)	10 (31.25%)	12 (37.5%)	0	8 (25%)	8 (25%)
							Control group				Experimental group
							Simplicity	Complexity	Total	Solution time (SD)	Simplicity	Complexity	Total	Solution time (SD)
						Insight problems	17 (13.28%)	34 (26.56%)	51 (39.84%)	141.26 (54.08)	4 (3.125%)	32 (25%)	36 (28.125%)	172.4 (40.33)
						Non-insight problems	9 (7.03%)	16 (12.5%)	25 (19.53%)	114.44 (41.09)	0	18 (14.06%)	18 (14.06%)	158.01 (36)

## Sheet: Experiment 2. Probe rates
	Practice trials		Non-insight problems				Insight problems
	Visual	Text	Seven matchsticks	Inequality	Relatives	Dance	Sally Lu	Hospital	Chain problem	Six pencils
1	0.916667	0.71875	0.608414		0.583012	0.516667	0.425532	0.687151		0.631868			Average
2	0.895833	1	0.96875	0.907407	0.947917	0.898305	0.923913	0.953846					Practice trials		0.916502
3	0.989583	1	0.935065	0.881356	0.901408	0.939394	0.910569		0.866667	0.898551			Insight problems		0.858863
4	0.90625	0.958333	0.88	0.778947		0.719298	0.75	0.935185	0.763689	0.946667			Non-insight problems		0.851743
5	0.96875	1		0.981481		0.936508	0.963415	0.97619	0.962185	0.960938
6	0.9375	1		0.809091	0.955556	0.831461		0.985849
7	0.958333	0.989474	0.928571	0.888889		0.882353	0.893382	0.97093
8	0.84375	0.958333	0.956897		0.847826	0.816667	0.844311			0.9625
9	0.8125	0.958333	0.827586	0.90604	0.855072	0.921569	0.898305		0.886667	0.849057
10	0.916667	0.979167	0.782609		0.780488	0.966667	0.94898			0.883534
11	0.958333	0.958333	0.931818				0.969163	0.952381
12	0.885417	0.9375	0.827586	0.924242	0.857143	0.925926	0.956522	0.876652		0.855204
13	0.885417	0.958333	0.897059	0.977778	0.952381	0.970588	0.979592	0.894737	0.991597	0.897143
14	0.90625	0.96875		0.813953		0.877778	0.925	0.875		0.835821
15	0.875	0.96875	0.808824	0.952381	0.727273	0.886525	0.949045		0.946565	0.88764
16	0.895833	0.958333	0.670588			0.713483	0.790909	0.674208	0.788889	0.642623
17	0.90625	0.9375	0.848837	0.74269	0.730769	0.862319	0.918269			0.931298
18	0.895833	0.895833	0.852113	0.815789	0.792453	0.855263	0.857143		0.809783	0.833333
19	0.864583	0.96875		0.933333	0.858491	0.691358	0.870968		0.53125	0.910256
20	0.9375	0.927083	0.72549	0.77551		0.772152	0.765517	0.752941
21	0.0729167	0.979167		0.972973	0.898551	0.789062	0.956204	0.787234	0.724868	0.933333
22	0.947917	0.875	0.884211	0.795455		0.88764	0.879195	0.909091	0.862857	0.852713
23	0.90625	0.96875	0.759259	0.947368	0.810526	0.773585	0.82	0.72093		0.851562
24	0.947917	0.989583	0.945122	0.986486	0.956522	0.910714	0.980132	0.915929
25	0.958333	0.989583	0.913043	0.933333	0.880952	0.867925	0.945946	0.919355	0.886364	0.93617
26	0.916667	1	0.785276	0.894231	0.918519	0.825	0.880658	0.827586		0.9
27	0.84375	0.989583	0.918919	0.862069	0.94382	0.862595	0.942857	0.839286	0.796875	0.909091
28	0.885417	0.979167	0.953846		0.950617	0.887755	0.955556	0.935484
29	0.927083	0.979167	0.95	0.883436	0.978261	0.909091	0.942149			0.941176
30	0.822917	0.989583	0.783333	0.684783	0.77551	0.632653	0.6875	0.730435	0.687179	0.673469
31	0.84375	0.833333	0.763889	0.646341	0.829787	0.685185	0.705882	0.640845		0.760766
32	0.864583	0.947917	0.912088	0.842857		0.830769	0.952381	0.875
